# Supplementary material
Source: PubMed Central journal article supplement (PMC5331751)
Supplement: EMBJ-36-568-s001.pdf [file EMBJ-36-568-s001.pdf]

Differential equation system that describes the RTK-PTP interaction network.

$$\frac{dRTKp_i}{dt} = (RTKt_i - RTKp_i)(k_1\alpha_1(RTKt_i - RTKp_i) + k_2\alpha_2RTKp_i) - k_2\gamma RTKp_iPTPa_i$$

$$\frac{dROS_i}{dt} = k_aRTKp_i - d_gROS_i + c(ROS_j - ROS_i)$$

$$\frac{dPTPa_i}{dt} = k_4(PTPt_i - PTPa_i) - k_3\beta PTPa_iROS_i$$

The constants are expressed in dimensionless units. The total protein concentrations are assumed to be constant in the time considered. The simulations in Fig.5 correspond to the following set of parameters:

$$\alpha = 0.1, \alpha_1 = 1, RTKt = 1, PTPt = 1, k_1 = k_2 = k_3 = k_4 = 0.5, \\ k_a = d_g = 0.5, c = 0.05, \gamma = 20, \beta = 50$$
